# Supplementary material for: First-Order Phase Transformation at Constant Volume: A Continuous Transition?
Source: MDPI journal article supplement (doi:10.3390/e24010031), 2021-12-24
Supplement: s1 [file s1]

# Supplementary material. First-order transition at constant volume: a continuous transition?

V.F. Correa and F.J. Castro

Consejo Nacional de Investigaciones Científicas y Técnicas (CONICET)  
Centro Atómico Bariloche (CNEA) and Instituto Balseiro (U. N. Cuyo)  
Av. Bustillo 9500, 8400 Bariloche, Río Negro, Argentina

The first-order phase transition between liquid and ice-VI water phases is driven under isochoric condition ( $V_0 = 13.4 \text{ cm}^3/\text{mol}$ ). Figures [S1](#), [S2](#) and [S3](#) show the corresponding changes in the Gibbs energy  $\Delta G(T) = G(T) - G_m^{liq}(T_1)$ , the internal energy  $\Delta U(T) = U(T) - U_m^{liq}(T_1)$  and the enthalpy  $\Delta H(T) = H(T) - H_m^{liq}(T_1)$ , respectively. As predicted, all of them are continuous at  $T_1$  and  $T_2$ , the temperature onset and end of the transition, respectively.

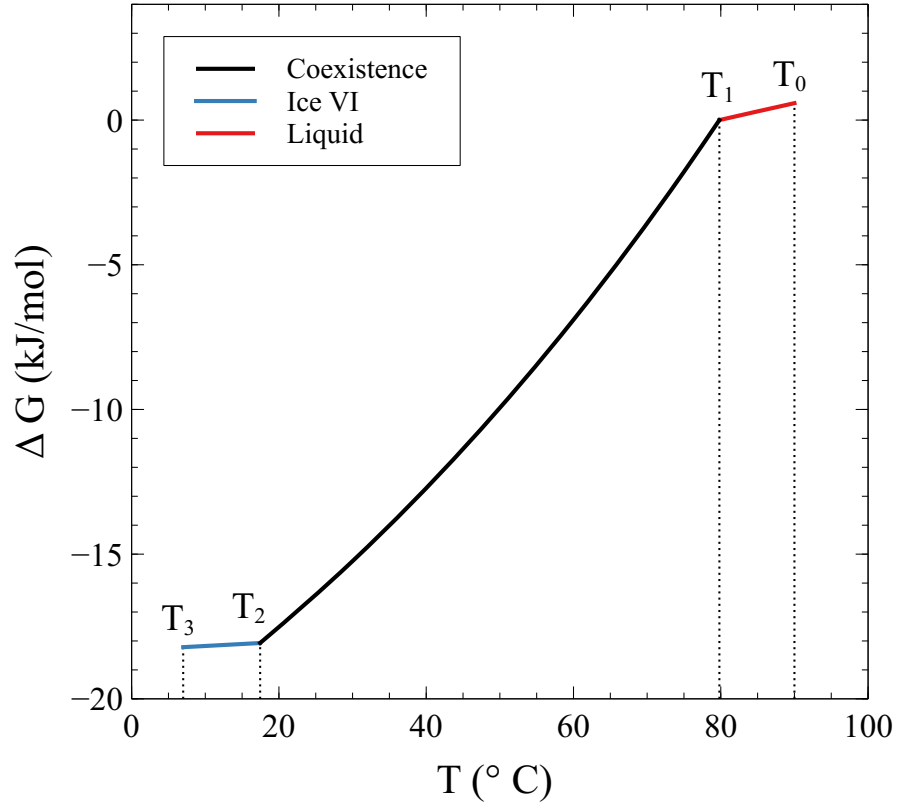

Figure S1: The Gibbs energy change  $\Delta G(T) = G(T) - G_m^{liq}(T_1)$  in a process at constant volume  $V_0 = 13.4 \text{ cm}^3/\text{mol}$ .

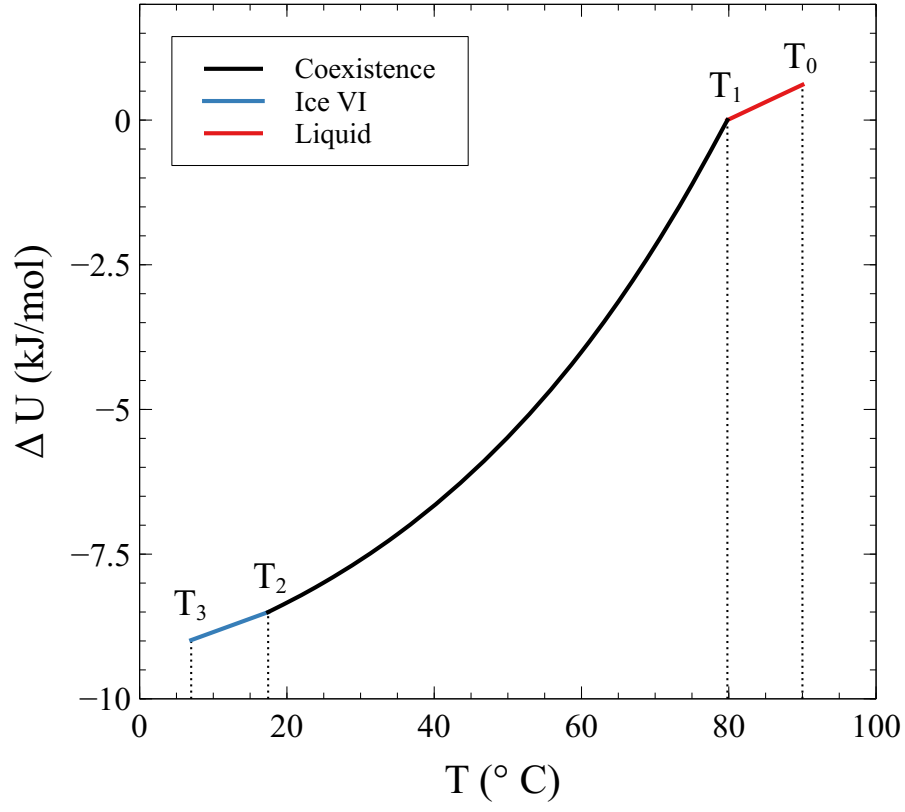

Figure S2: The internal energy change  $\Delta U(T) = U(T) - U_m^{liq}(T_1)$  in a process at constant volume  $V_0 = 13.4 \text{ cm}^3/\text{mol}$ .

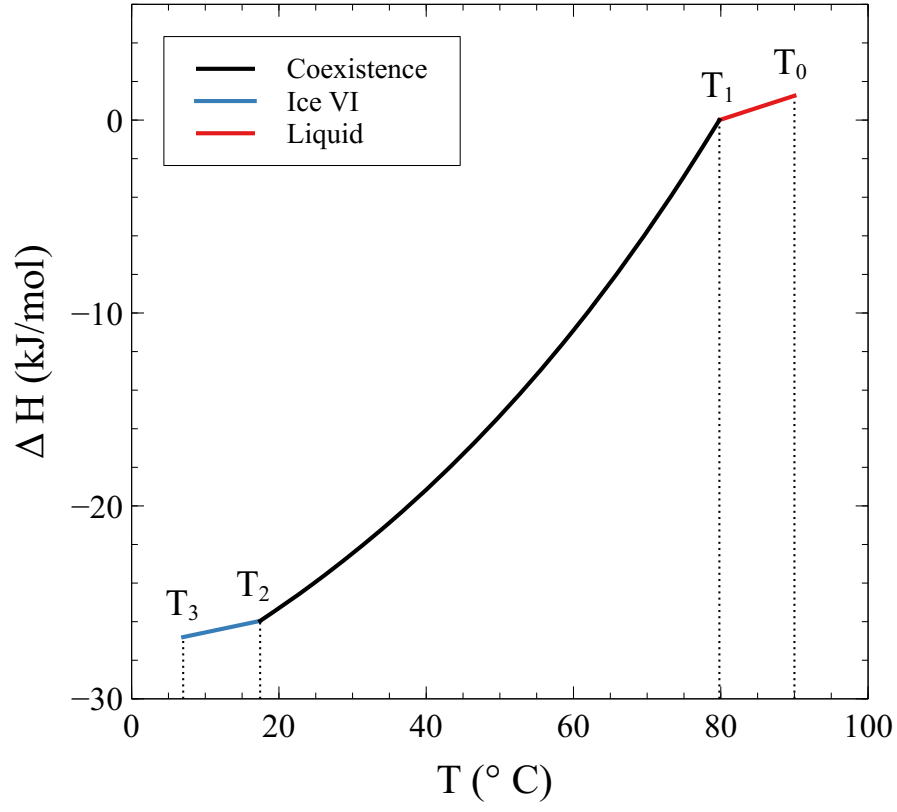

Figure S3: The enthalpy change  $\Delta H(T) = H(T) - H_m^{liq}(T_1)$  in a process at constant volume  $V_0 = 13.4$  cm<sup>3</sup>/mol.
